# Supplementary material for: Scalable synthesis of highly dispersed silicon nanospheres by RF thermal plasma and their use as anode materials for high-performance Li-ion batteries
Source: Royal Society of Chemistry journal article supplement (doi:10.1039/c5ta04620c), 2015-01-01
Supplement: c5ta04620c1.pdf [file c5ta04620c1.pdf]

## Supplementary Information

### **Scalable Synthesis of Highly Dispersed Silicon Nanoapheres by RF Thermal Plasma and their use as Anode Materials for High- Performance Li-ion Batteries**

Guolin Hou<sup>ab</sup>, Benli Cheng<sup>c</sup>, Yuebin Cao<sup>a</sup>, Mingshui Yao<sup>d</sup>, Fei Ding<sup>a</sup>, Peng Hu<sup>a</sup> and

Fangli Yuan<sup>\*a</sup>

<sup>a</sup> State Key Laboratory of Multi-phase Complex Systems, Institute of Process Engineering, Chinese Academy of Sciences (CAS), Zhongguancun Beiertiao 1 Hao, Beijing 100190, P. R. China

<sup>b</sup> University of Chinese Academy of Sciences (UCAS), No.19A Yuquan Road, Beijing 100049, P. R. China

<sup>c</sup> Green Eco-Manufacture Co.,Ltd. Tianjin Branch, Tianjin, 301600, P. R. China

<sup>d</sup> State Key Laboratory of Structural Chemistry, Fujian Institute of Research on the Structure of Matter, Chinese Academy of Sciences (CAS), 155 Yangqiao Road west, Fuzhou, 350002, P. R. China

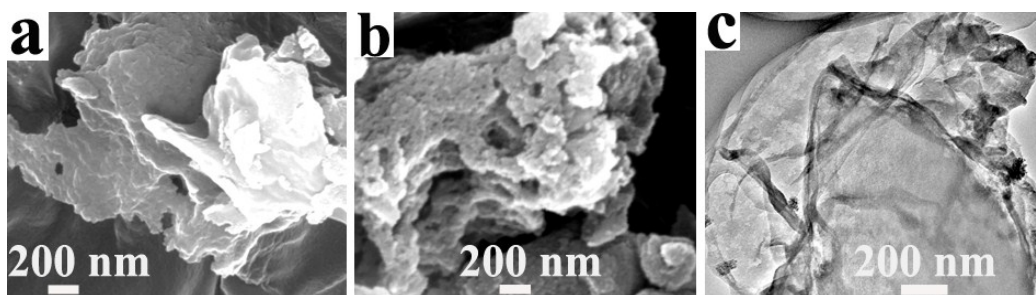

Fig. S1 (a)-(b) SEM image and (c)TEM image of porous carbon (PC)

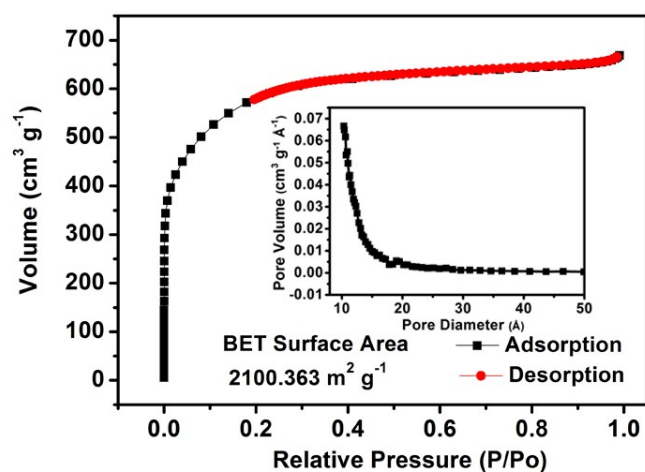

Fig. S2 N<sub>2</sub> adsorption–desorption isotherm of PC and the inset is the corresponding BJH pore size distribution

Table S1. Detailed Parameters for RF Induction Thermal Plasma Processing

| parameters          | values                             |
|---------------------|------------------------------------|
| Plasma power        | 10 kW                              |
| Central gas, argon  | 0.8 m <sup>3</sup> h <sup>-1</sup> |
| Sheath gas, argon   | 1.0 m <sup>3</sup> h <sup>-1</sup> |
| Carrier gas, argon  | 0.3 m <sup>3</sup> h <sup>-1</sup> |
| Cooling gas, argon  | 0-2 m <sup>3</sup> h <sup>-1</sup> |
| Powder feeding rate | 2 g min <sup>-1</sup>              |

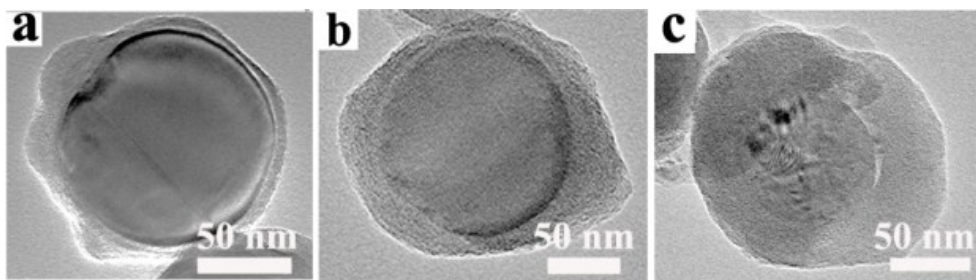

Fig. S3 TEM images of SiNS/PC-1:2 (a), SiNS/PC-1:1 (b), and SiNS/PC-4:1 composites (c)

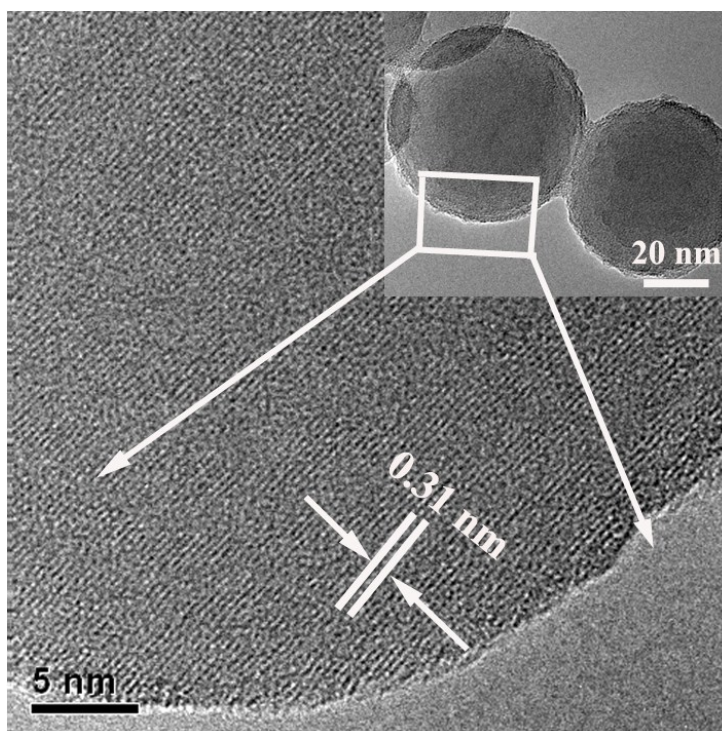

Fig. S4 The magnified and HRTEM images of single Si nanosphere

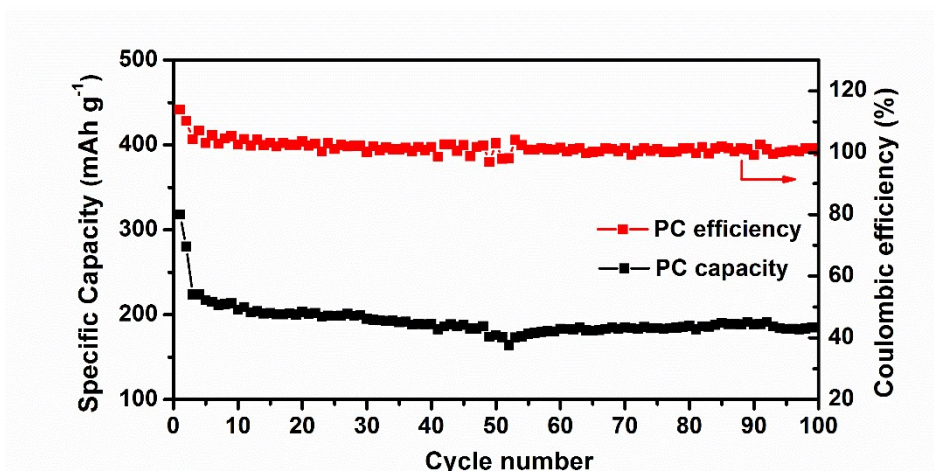

Fig. S5 The cycling performance of porous carbon electrode.
